# Supplementary material for: Peripartum Cardiomyopathy: Diagnostic and Prognostic Value of Cardiac Magnetic Resonance in the Acute Stage
Source: MDPI journal article supplement (doi:10.3390/diagnostics12020378), 2022-02-01
Supplement: s1 [file s1]

## Supplementary Materials

### Appendix S1

Technical parameters of quantitative cardiac magnetic resonance sequences:

#### *T1 mapping and ECV*

For myocardial T1 mapping, a standard, electrocardiogram synchronized 3(3)3(3)5 modified Look-Locker inversion recovery (MOLLI) acquisition scheme<sup>17</sup> was applied using the following parameters: time of repetition 2.2 ms, time of echo 1.02 ms, flip angle 35°, parallel imaging factor 2, acquired voxel size 1.97 x 2 × 10 mm, reconstructed voxel size 1.17 × 1.17 x 10 mm, scan duration/breath hold 15.0 s, 3 slices. Post-contrast T1 maps were performed 10 minutes after contrast injection in the same positions as pre-contrast examinations using the same imaging technique.

#### *T2 mapping*

For myocardial T2 mapping, a six-echo gradient spin echo (GraSE) sequence<sup>16</sup> was used with application of the following parameters: time of repetition 1 RR interval, time of echo 23.6/ΔTE = 11.8 (6Ec), flip angle 90°, parallel imaging factor 2, acquired voxel size 1.97 × 2.03 × 10 mm, reconstructed voxel size 1.03 × 1.03 x 10 mm, scan duration/breath hold 14.0 s, 3 slices.

**Table S1.** Exemplary sequence parameters of the cardiac magnetic resonance scan protocol.

| Parameter                                            | SSFP Cine (SA)                  | Black-blood T2 STIR (SA)           | LGE (SA)                          |
|------------------------------------------------------|---------------------------------|------------------------------------|-----------------------------------|
| Field of view (mm)                                   | 350 x 350                       | 350 x 350                          | 360 x 311                         |
| TR (ms)<br>TE (ms)                                   | 2.8<br>1.38                     | 2 RR intervals<br>70               | 3.5<br>1.71                       |
| Flip angle (°)                                       | 60                              | 90                                 | 15                                |
| Voxel size (mm) acquired,<br>reconstructed           | 1.79 x 2 x 8<br>0.99 x 0.99 x 8 | 1.51 x 2.43 x 8<br>0.91 x 0.91 x 8 | 1.65 x 1.88 x 10<br>0.9 x 0.9 x 5 |
| Parallel imaging factor                              | 3                               | 2.5                                | 2                                 |
| Scan duration                                        | 1 min 24 s                      | 1 min 36 s                         | 27 s                              |
| Scan time/ breath-hold                               | 13 s                            | 8 s                                | 12 s                              |
| Cardiac phases per RR interval<br>Shot duration (ms) | 40<br>-                         | -<br>134                           | -<br>151                          |

SSFP=steady-state free precession, STIR=short-tau inversion recovery, LGE=late gadolinium enhancement, SA=short axis view, TR=time of repetition, TE=time to echo.
